# Supplementary material for: Switching the charge transfer characteristics of quaterthiophene from p-type to n-type via interactions with carbon nanotubes
Source: Royal Society of Chemistry journal article supplement (doi:10.1039/c9cp03030a), 2019-01-01
Supplement: c9cp03030a1.pdf [file c9cp03030a1.pdf]

## Supplementary Information

### Switching Charge Transfer Characteristics of Quaterthiophene from p-type to n-type via Interactions with Carbon Nanotube

Ankita Joshi and C.N. Ramachandran\*

Department of Chemistry, Indian Institute of Technology Roorkee, Roorkee, Uttarakhand,  
India-247667

\*e-mail: ramcnfcy@iitr.ac.in

#### Calculation of Charge Transport Parameters

The transfer integral for an electron ( $t_-$ ) can be calculated from the energies of LUMO and LUMO+1,

$$t_- = \frac{E_{LUMO+1} - E_{LUMO}}{2} \quad (1)$$

and that for a hole ( $t_+$ ) can be determined from the energies of HOMO and HOMO-1,

$$t_+ = \frac{E_{HOMO} - E_{HOMO-1}}{2} \quad (2)$$

The reorganization energy for any charged species (hole/electron) is given by,

$(E(\text{charged species}) - E^0(\text{charged species})) + (E(\text{neutral geometry obtained from the charged species}) - E^0(\text{neutral geometry}))$ , where  $E$  is the energy of unoptimized and  $E^0$  is the energy of optimized species.

The rate of charge transfer ( $k$ ) is calculated based on Marcus theory,

$$k = \frac{4\pi^2}{h} \frac{1}{\sqrt{4\pi k_B T}} t^2 e^{-\lambda/k_B T} \quad (3)$$

where,  $h$  is the Planck's constant,  $T$  is the room temperature (298 K) and  $k_B$  is the Boltzmann constant.

The diffusion coefficient  $D$  is given by

$$D = \frac{kL^2}{2} \quad (4)$$

where  $L$  is the nearest center-to-center distance

The Einstein relation for the mobility of charge carriers ( $\mu$ ) is given by,

$$\mu = \frac{eD}{k_B T} \quad (5)$$

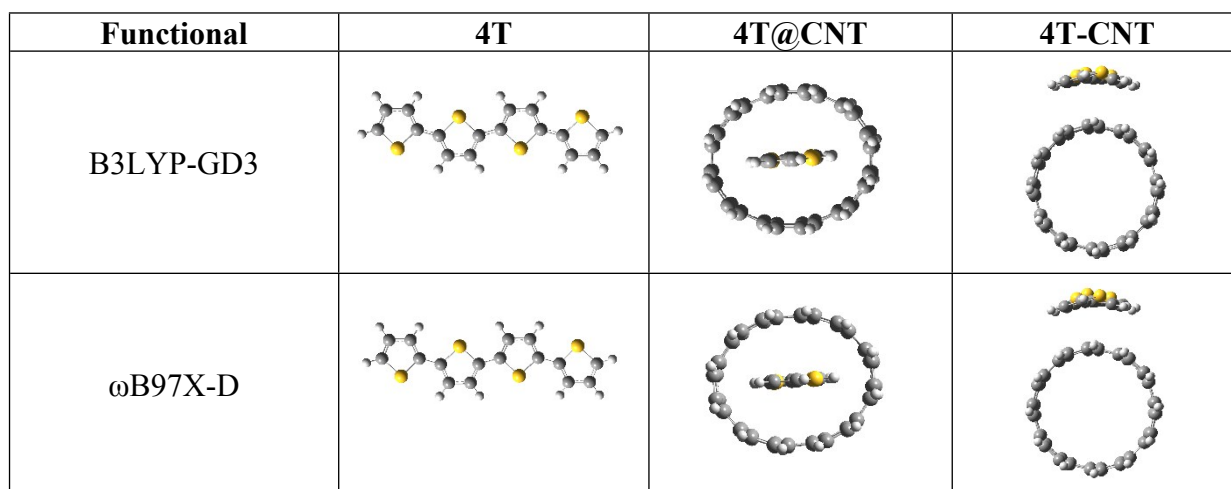

Figure S1. Optimized geometries of 4T, 4T@CNT and 4T-CNT obtained at B3LYP-GD3 and  $\omega$ B97X-D levels.

| B97-D                                                                               | B3LYP-GD3                                                                           | $\omega$ B97X-D                                                                       |
|-------------------------------------------------------------------------------------|-------------------------------------------------------------------------------------|---------------------------------------------------------------------------------------|
| 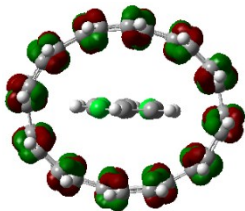   |    |    |
| $E_{\text{LUMO}+1} = -2.93 \text{ eV}$                                              | $E_{\text{LUMO}+1} = -2.60 \text{ eV}$                                              | $E_{\text{LUMO}+1} = -1.42 \text{ eV}$                                                |
|  |  |  |
| $E_{\text{LUMO}} = -3.11 \text{ eV}$                                                | $E_{\text{LUMO}} = -2.79 \text{ eV}$                                                | $E_{\text{LUMO}} = -1.66 \text{ eV}$                                                  |
|  |  |  |
| $E_{\text{HOMO}} = -3.76 \text{ eV}$                                                | $E_{\text{HOMO}} = -4.29 \text{ eV}$                                                | $E_{\text{HOMO}} = -5.64 \text{ eV}$                                                  |
|  |  |  |
| $E_{\text{HOMO}-1} = -3.91 \text{ eV}$                                              | $E_{\text{HOMO}-1} = -4.44 \text{ eV}$                                              | $E_{\text{HOMO}-1} = -5.86 \text{ eV}$                                                |

Figure S2. Selected molecular orbitals and the corresponding energy for 4T@CNT obtained at different levels.

| B97-D                                                                               | B3LYP-GD3                                                                           | $\omega$ B97X-D                                                                       |
|-------------------------------------------------------------------------------------|-------------------------------------------------------------------------------------|---------------------------------------------------------------------------------------|
| 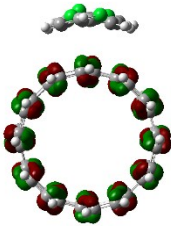   |    |    |
| $E_{\text{LUMO}+1} = -2.90 \text{ eV}$                                              | $E_{\text{LUMO}+1} = -2.56 \text{ eV}$                                              | $E_{\text{LUMO}+1} = -1.40 \text{ eV}$                                                |
|  |  |  |
| $E_{\text{LUMO}} = -3.09 \text{ eV}$                                                | $E_{\text{LUMO}} = -2.78 \text{ eV}$                                                | $E_{\text{LUMO}} = -1.65 \text{ eV}$                                                  |
|  |  |  |
| $E_{\text{HOMO}} = -3.89 \text{ eV}$                                                | $E_{\text{HOMO}} = -4.26 \text{ eV}$                                                | $E_{\text{HOMO}} = -5.61 \text{ eV}$                                                  |
|  |  |  |
| $E_{\text{HOMO}-1} = -4.08 \text{ eV}$                                              | $E_{\text{HOMO}-1} = -4.47 \text{ eV}$                                              | $E_{\text{HOMO}-1} = -5.84 \text{ eV}$                                                |

Figure S3. Selected molecular orbitals and the corresponding energy for **4T-CNT** obtained at different levels.

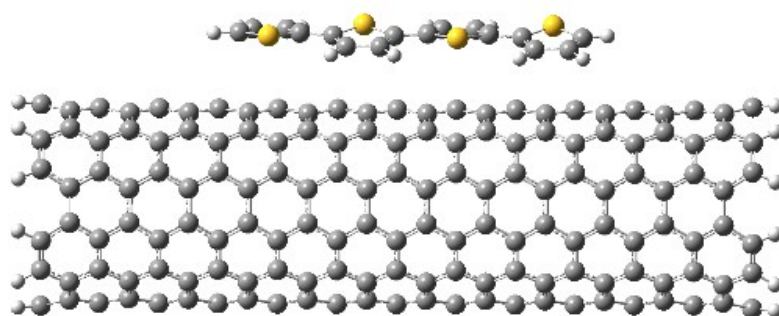

Figure S4. Optimized geometry of the exohedral complex of **long CNT** with **4T** obtained at B3LYP-GD3 level.

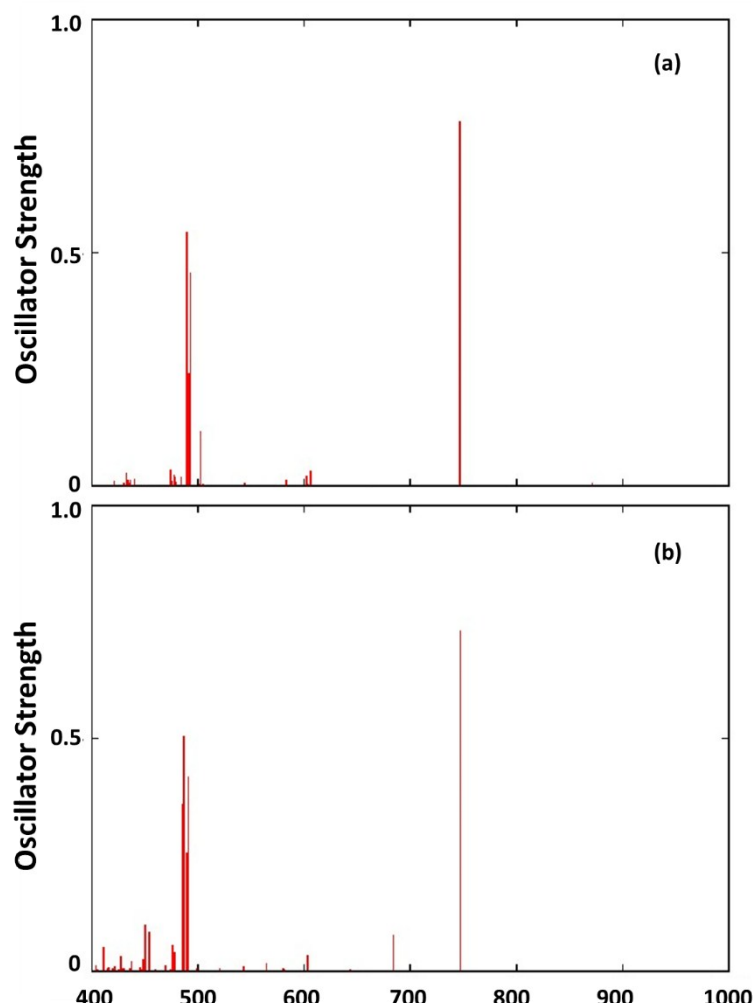

Figure S5. Simulated absorption spectra of (a) 4T@(7,7)CNT and (b) 4T-(7,7)CNT at B3LYP-GD3/6-31G(d,p) level.

Table S1. Calculated values of ionization energy (IE), electron affinity (EA), energy gap between HOMO and LUMO ( $\Delta E_{H-L}$ ) for 4T, CNT and their complexes at different levels. All values are in eV.

| Complex               | Functional      | VIE            | AIE            | VEA   | AEA   | $\Delta E_{H-L}$          |
|-----------------------|-----------------|----------------|----------------|-------|-------|---------------------------|
| 4T                    | B97-D           | 6.01           | 5.89           | -0.72 | -0.82 | 1.87                      |
|                       | B3LYP-GD3       | 6.33           | 6.13           | -0.59 | -0.77 | 3.15 (3.13 <sup>a</sup> ) |
|                       | $\omega$ B97X-D | 6.86           | 6.49           | -0.21 | -0.56 | 6.93                      |
| (6,6)CNT <sup>b</sup> | B97-D           | 4.93           | 4.90           | -2.15 | -2.17 | 0.80                      |
|                       | B3LYP-GD3       | 5.06           | 5.03           | -2.06 | -2.09 | 1.47                      |
|                       | $\omega$ B97X-D | 5.50           | 5.43           | -1.83 | -1.90 | 3.97                      |
| 4T@CNT                | B97-D           | — <sup>c</sup> | — <sup>c</sup> | -2.13 | -2.15 | 0.64                      |
|                       | B3LYP-GD3       | 5.03           | 5.01           | -2.04 | -2.07 | 1.50                      |
|                       | $\omega$ B97X-D | 5.48           | 5.43           | -1.81 | -1.87 | 3.98                      |
| 4T-CNT                | B97-D           | 4.86           | 4.83           | -2.13 | -2.15 | 0.80                      |
|                       | B3LYP-GD3       | 5.01           | 4.97           | -2.04 | -2.07 | 1.45                      |
|                       | $\omega$ B97X-D | 5.45           | 5.37           | -1.81 | -1.88 | 3.96                      |

<sup>a</sup>Ref. [48]

<sup>b</sup>Ref. [42-44]

<sup>c</sup>Convergence criteria not met.

Table S2. Calculated values of maximum absorption wavelength ( $\lambda_{max}$ ), oscillator strength (f) and light-harvesting efficiency (LHE) for 4T at different levels.

| Functional      | $\lambda_{\max}$ (nm)  | f    | LHE (%) |
|-----------------|------------------------|------|---------|
| B97-D           | 490                    | 1.14 | 93      |
| B3LYP-GD3       | 423 (436) <sup>a</sup> | 1.19 | 94      |
| $\omega$ B97X-D | 344                    | 1.20 | 94      |

<sup>a</sup>Ref. [59]

Table S3. The absorption wavelength, oscillator strength, orbital contribution and molecular orbitals involved in the transition of the complex 4T@CNT obtained at B3LYP-GD3/6-31G(d,p) level.

| Wavelength (nm) | Oscillator strength | Orbital contribution (%) | Molecular orbitals involved                                                                    |                                                                                                 |
|-----------------|---------------------|--------------------------|------------------------------------------------------------------------------------------------|-------------------------------------------------------------------------------------------------|
| 738             | 0.76                | 48                       | <br>HOMO-2   | <br>LUMO     |
|                 |                     | 47                       | <br>HOMO    | <br>LUMO+1  |
| 473             | 0.27                | 22                       | <br>HOMO-7 | <br>LUMO   |
|                 |                     | 20                       | <br>HOMO-5 | <br>LUMO+1 |
| 468             | 0.05                | 67                       | <br>HOMO-8 | <br>LUMO+1 |
|                 |                     | 35                       | <br>HOMO-2 | <br>LUMO   |

|     |      |    |                                                                                              |                                                                                                |
|-----|------|----|----------------------------------------------------------------------------------------------|------------------------------------------------------------------------------------------------|
| 463 | 0.05 |    | HOMO-2                                                                                       | LUMO+9                                                                                         |
|     |      | 42 | <br>HOMO-2 | <br>LUMO+10 |



|     |      |    |                                                                                                  |                                                                                                    |
|-----|------|----|--------------------------------------------------------------------------------------------------|----------------------------------------------------------------------------------------------------|
| 458 | 0.19 | 25 | 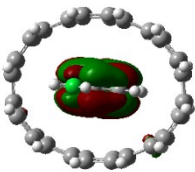 <p>HOMO-1</p> |  <p>LUMO+14</p> |
| 453 | 0.16 | 46 |  <p>HOMO-1</p> |  <p>LUMO+14</p> |
| 445 | 0.10 | 54 |  <p>HOMO-1</p> |  <p>LUMO+15</p> |

Table S4. The absorption wavelength, oscillator strength, orbital contribution and molecular orbitals involved in the transition of the complex **4T-CNT** obtained at B3LYP-GD3/6-31G(d,p) level.

| Wavelength (nm) | Oscillator strength | Orbital contribution (%) | Molecular orbitals involved                                                                   |                                                                                                 |
|-----------------|---------------------|--------------------------|-----------------------------------------------------------------------------------------------|-------------------------------------------------------------------------------------------------|
| 731             | 0.68                | 44                       | <br>HOMO-1   | <br>LUMO     |
|                 |                     | 42                       | <br>HOMO     | <br>LUMO+1   |
| 685             | 0.17                | 87                       | <br>HOMO-2  | <br>LUMO    |
| 464             | 0.24                | 61                       | <br>HOMO-2 | <br>LUMO+3 |
| 462             | 0.26                | 50                       | <br>HOMO-2 | <br>LUMO+4 |
| 460             | 0.32                | 26                       | <br>HOMO-2 | <br>LUMO+3 |
| 459             | 0.31                | 34                       | <br>HOMO-2 | <br>LUMO+4 |

|     |      |    |                                                                                               |                                                                                                  |
|-----|------|----|-----------------------------------------------------------------------------------------------|--------------------------------------------------------------------------------------------------|
| 448 | 0.07 | 30 | 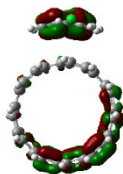<br>HOMO-10  | <br>LUMO      |
|     |      | 19 | <br>HOMO-9   | <br>LUMO      |
| 446 | 0.14 | 35 | <br>HOMO-2   | <br>LUMO+5    |
| 445 | 0.09 | 24 | <br>HOMO-2  | <br>LUMO+5   |
|     |      | 52 | <br>HOMO   | <br>LUMO+12 |
| 439 | 0.05 | 19 | <br>HOMO-1 | <br>LUMO+14 |

Table S5. Calculated values of transfer integral ( $t$ ), internal reorganization energy ( $\lambda$ ), rate constant ( $k$ ) and carrier mobility ( $\mu$ ) for the complexes at different distance between centres of **4T** and **CNT** ( $d_{c-c}$ ) obtained at B3LYP-GD3/6-31G(d,p) level.

| <b>Complex</b> | <b><math>d_{c-c}</math> (Å)</b> | <b><math>\lambda^+</math> (meV)</b> | <b><math>\lambda^-</math> (meV)</b> | <b><math>t^+</math> (meV)</b> | <b><math>t^-</math> (meV)</b> | <b><math>k^+</math> (s<sup>-1</sup>)</b> | <b><math>k^-</math> (s<sup>-1</sup>)</b> | <b><math>\mu^+</math> (cm<sup>2</sup> V<sup>-1</sup>s<sup>-1</sup>)</b> | <b><math>\mu^-</math> (cm<sup>2</sup> V<sup>-1</sup>s<sup>-1</sup>)</b> |
|----------------|---------------------------------|-------------------------------------|-------------------------------------|-------------------------------|-------------------------------|------------------------------------------|------------------------------------------|-------------------------------------------------------------------------|-------------------------------------------------------------------------|
| 4T@(7,7)CNT    | 4.29                            | 59                                  | 52                                  | 60                            | 67                            | $0.24 \times 10^{14}$                    | $0.51 \times 10^{14}$                    | 0.86                                                                    | 1.83                                                                    |
| 4T-(7,7)CNT    | 3.31                            | 63                                  | 58                                  | 57                            | 63                            | $0.20 \times 10^{14}$                    | $0.29 \times 10^{14}$                    | 0.42                                                                    | 0.62                                                                    |
